# Supplementary figures and images for: Design, fabrication, and properties of macroscale supramolecular fibers consisted of fully hydrogen-bonded pseudo-polymer chains
Source: Royal Society of Chemistry journal article supplement (doi:10.1039/b103864h), 2001-01-01

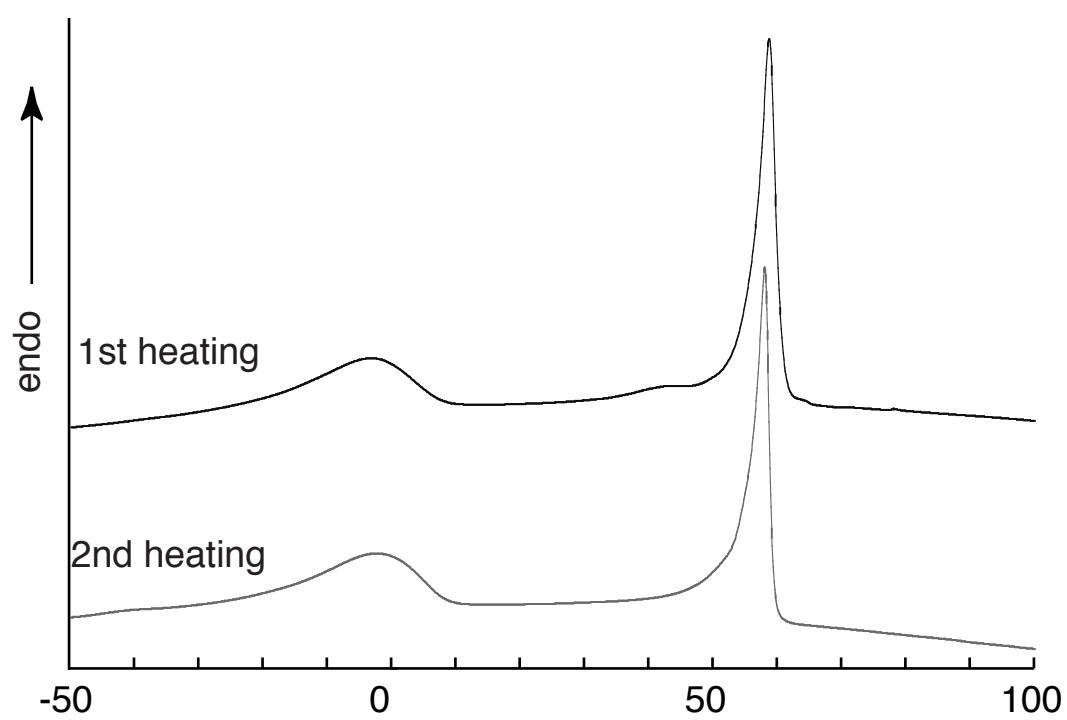

**Fig.** DSC curves of the fiber sample (temperature scan rate  $20^{\circ}\text{C min}^{-1}$ ).

Supplement: b103864h.pdf [file b103864h.pdf]

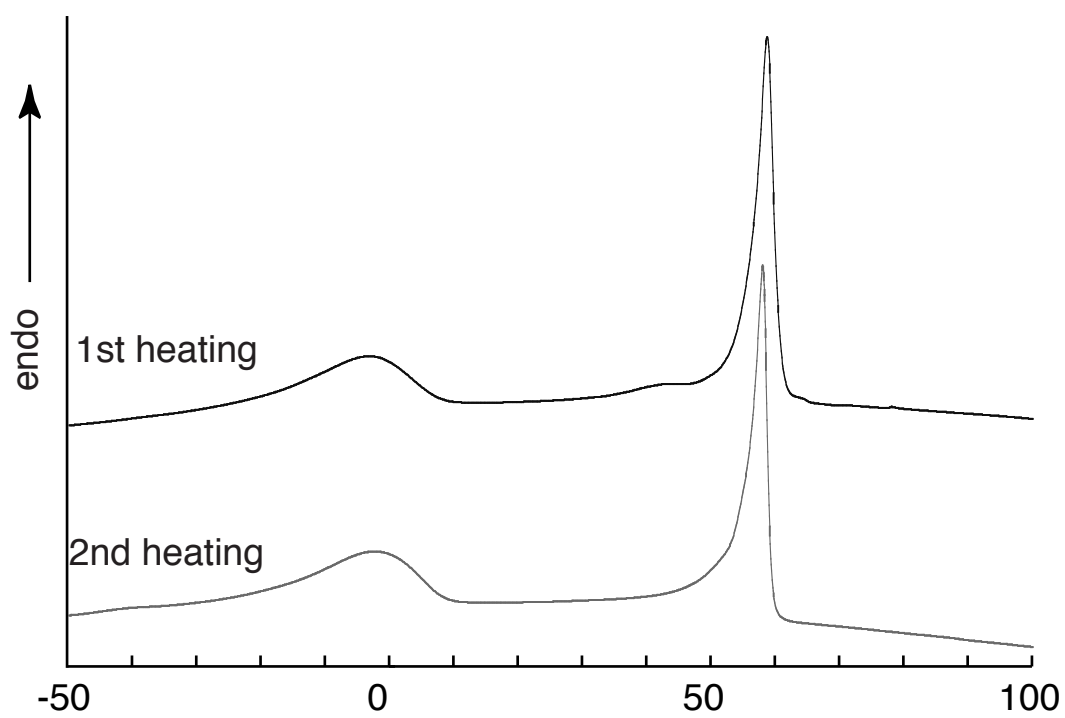

**Fig.** DSC curves of the fiber sample (temperature scan rate 20°C min<sup>-1</sup>).

Supplement: b103864h.pdf [file b103864h.pdf]
